# Supplementary material for: Developing a multi-institutional nomogram for assessing lung cancer risk in patients with 5–30 mm pulmonary nodules: a retrospective analysis
Source: PeerJ. 2023 Dec 13;11:e16539. doi: 10.7717/peerj.16539 (PMC10725170; doi:10.7717/peerj.16539)
Supplement: Supplemental Information 3 [file peerj-11-16539-s003.xls]

## Sheet: Sheet1
id	Status	Age	Gender	Smoking history	Annual smoking volume	Dust exposure history	Family history of malignancy	Family history of lung cancer	Density of the nodule	Nodule diameter	Spiculation	Edge	Lobulation	Shape	Calcification	Cavity	Vacuole	Vascular convergence	Bronchiole	Pleural traction
1	1	0	1	0	0	0	0	0	3	1	1	0	0	0	0	0	0	1	1	1
2	1	0	1	0	0	0	0	0	2	1	0	0	1	0	0	0	0	1	1	0
3	1	0	1	0	0	0	0	0	3	1	0	0	1	0	0	0	0	1	1	1
4	0	1	0	1	1	0	0	0	3	1	1	0	1	0	0	0	0	0	0	1
5	1	1	0	1	1	0	0	0	3	1	0	0	1	0	0	0	0	1	1	1
6	1	0	1	0	0	0	0	0	2	0	0	0	0	0	0	0	0	0	0	0
7	1	1	1	0	0	0	0	0	2	1	0	0	0	0	0	0	0	1	0	0
8	1	1	0	0	0	0	0	0	3	2	0	0	1	0	0	0	0	1	0	1
9	0	0	1	0	0	0	0	0	3	1	0	0	1	0	0	0	0	0	0	0
10	1	0	0	1	1	0	0	0	3	1	1	0	1	0	0	0	0	1	1	0
11	0	0	1	0	0	0	0	0	3	1	0	1	0	1	0	0	0	1	0	0
12	1	1	0	1	1	0	0	0	3	1	1	0	1	0	0	0	0	1	0	1
13	1	0	1	0	0	0	0	0	2	1	0	0	1	0	0	0	0	1	1	0
14	1	1	1	0	0	0	0	0	1	0	0	0	1	0	0	0	0	1	1	0
15	0	0	1	0	0	0	0	0	3	1	0	0	1	0	1	0	0	1	0	1
16	1	0	0	0	0	0	0	0	2	1	0	1	1	0	0	0	0	1	0	0
17	0	1	0	1	1	0	0	0	3	0	0	0	1	0	0	0	0	0	0	1
18	1	0	1	0	0	0	0	0	2	1	0	0	1	0	0	0	0	0	0	1
19	1	1	0	1	1	0	0	0	3	0	0	0	1	0	1	0	0	1	0	1
20	1	0	1	0	0	0	0	0	2	1	0	0	1	0	0	0	0	0	0	0
21	1	0	1	0	0	0	0	0	3	2	0	0	1	0	0	0	0	1	1	1
22	1	0	1	0	0	0	0	0	2	1	0	0	1	0	0	0	0	1	0	0
23	1	0	1	0	0	0	0	0	3	2	1	0	1	0	0	0	0	1	1	1
24	0	0	0	1	1	0	1	0	3	2	0	0	1	0	0	0	0	1	0	1
25	1	0	1	0	0	0	0	0	2	2	0	0	1	0	0	0	0	1	1	1
26	1	0	1	0	0	0	0	0	2	2	0	0	1	0	0	0	0	1	0	0
27	1	0	1	0	0	0	0	0	3	1	0	0	1	0	0	0	0	1	1	1
28	1	0	1	0	0	0	0	0	2	1	1	0	1	0	0	0	0	1	0	1
29	0	0	0	1	1	0	0	0	2	1	0	0	0	0	0	0	0	1	0	0
30	0	1	1	0	0	0	0	0	3	1	0	1	1	0	0	0	0	0	0	0
31	0	0	0	1	1	0	0	0	3	1	0	0	1	0	0	0	0	0	0	1
32	0	0	1	0	0	0	0	0	3	1	0	1	1	0	0	0	0	1	0	0
33	1	1	1	0	0	0	0	0	3	1	1	0	1	0	0	0	0	1	0	1
34	0	0	0	1	1	0	0	0	3	1	0	0	1	0	1	0	0	1	0	1
35	1	1	1	0	0	0	0	0	3	2	1	0	1	0	0	0	0	1	0	1
36	0	0	1	0	0	0	0	0	1	1	0	0	1	0	0	0	0	1	1	0
37	1	0	1	0	0	0	0	0	2	1	0	0	1	0	0	0	0	1	0	1
38	1	0	1	0	0	0	0	0	2	0	0	0	1	0	0	0	0	1	0	0
39	1	1	0	1	1	0	0	0	3	1	0	0	1	0	0	0	1	1	0	1
40	0	1	0	1	1	0	0	0	3	0	1	0	1	0	0	0	0	1	0	0
41	1	0	1	0	0	0	0	0	3	1	1	0	1	0	0	0	0	1	0	1
42	1	1	0	1	1	0	0	0	3	1	1	0	1	0	0	0	0	1	0	1
43	1	0	0	1	1	0	0	0	3	2	0	0	1	0	0	0	0	1	0	1
44	1	1	0	0	0	0	0	0	3	1	0	0	1	0	0	0	0	1	0	1
45	0	1	0	1	1	0	0	0	3	0	0	0	1	1	0	0	0	1	0	1
46	1	0	1	0	0	0	0	0	2	1	0	0	1	0	0	0	0	1	0	0
47	0	1	1	0	0	0	0	0	3	1	0	0	1	0	1	0	0	0	0	1
48	0	1	0	0	0	0	0	0	3	1	1	0	1	0	0	0	0	1	0	1
49	1	0	1	0	0	0	0	0	3	1	1	0	1	0	0	0	1	1	1	1
50	0	1	1	0	0	0	0	0	3	1	1	0	1	0	0	0	0	0	0	1
51	1	1	0	1	1	0	0	0	2	1	1	0	1	0	0	0	1	1	0	0
52	1	1	0	1	1	0	0	0	3	1	1	0	1	0	0	0	0	1	0	1
53	0	1	0	0	0	0	0	0	3	2	1	0	1	0	0	0	0	1	0	1
54	0	0	0	0	0	0	0	0	3	1	0	0	1	0	0	0	0	1	0	1
55	0	0	1	1	1	0	0	0	3	1	0	0	1	0	0	0	0	1	0	1
56	1	1	0	1	1	0	0	0	2	1	0	0	1	0	0	0	0	0	1	1
57	0	0	1	0	0	0	0	0	3	2	1	0	1	0	1	0	0	0	0	1
58	0	1	0	0	0	0	0	0	3	1	1	0	0	0	0	0	0	1	0	0
59	1	0	1	0	0	0	0	0	2	2	0	1	0	1	0	0	0	1	0	1
60	1	1	1	0	0	0	0	0	2	0	0	0	0	0	0	0	0	1	0	0
61	1	0	0	1	1	0	0	0	2	1	0	0	1	0	0	0	0	1	0	0
62	1	0	1	0	0	0	0	0	1	0	0	1	0	0	0	0	1	1	0	0
63	1	1	0	1	1	0	0	0	3	1	0	0	1	0	0	0	0	1	1	0
64	0	0	1	0	0	0	0	0	3	2	0	0	1	0	0	0	0	0	0	1
65	1	1	1	0	0	0	0	0	3	1	0	0	1	0	0	0	0	1	1	1
66	1	1	0	1	1	0	0	0	3	2	1	0	1	0	0	0	1	1	1	0
67	1	1	0	1	1	0	0	0	3	2	0	0	1	0	0	0	1	1	0	0
68	1	0	1	0	0	0	0	0	3	0	0	1	0	0	0	0	1	1	0	0
69	1	1	0	1	1	0	0	0	3	2	1	0	1	0	0	0	0	1	0	1
70	1	0	1	0	0	0	0	0	1	1	0	0	1	0	0	0	0	1	0	0
71	1	1	1	0	0	0	0	0	3	1	0	0	1	0	0	0	0	1	0	1
72	1	0	1	0	0	0	0	0	3	1	1	0	1	0	0	0	0	1	1	1
73	1	1	0	1	1	0	0	0	3	1	0	0	1	0	0	0	0	1	1	1
74	1	1	0	0	0	0	0	0	3	1	0	0	1	0	0	0	0	1	0	1
75	1	1	0	0	0	0	0	0	3	1	1	0	1	0	0	0	0	1	0	1
76	0	1	0	1	1	0	0	0	3	1	1	0	1	0	0	0	0	1	0	1
77	0	0	0	1	1	0	0	0	3	0	0	1	0	1	0	0	0	0	0	0
78	0	1	0	0	0	0	0	0	3	0	0	1	0	0	0	0	0	1	0	1
79	1	0	1	0	0	0	0	0	2	1	0	0	1	0	0	0	0	1	0	0
80	0	0	1	0	0	0	0	0	3	2	0	0	1	0	1	0	0	1	0	1
81	1	1	1	0	0	0	0	0	3	1	1	0	1	0	0	0	0	1	0	1
82	1	0	0	1	1	0	0	0	2	0	0	0	1	0	0	0	0	1	0	0
83	0	0	0	1	1	1	0	0	3	2	0	0	1	0	0	0	0	1	0	1
84	1	0	1	0	0	0	0	0	3	1	0	0	1	0	0	0	0	1	1	1
85	1	1	1	0	0	0	0	0	3	1	0	0	1	0	0	0	0	1	0	1
86	1	0	1	0	0	0	0	0	3	1	0	0	1	0	0	0	0	1	0	1
87	0	0	1	0	0	0	0	0	3	0	0	1	0	1	0	0	0	0	0	0
88	1	0	0	1	1	0	0	0	3	1	1	0	1	0	0	0	1	1	0	0
89	1	0	0	1	1	0	0	0	3	1	1	0	1	0	0	0	0	1	1	1
90	0	1	0	0	0	0	0	0	3	1	0	0	1	0	1	0	0	0	0	0
91	0	0	1	0	0	0	0	0	3	1	0	1	0	0	0	0	0	0	0	0
92	1	1	0	0	0	0	0	0	3	1	0	0	1	0	0	0	1	1	0	0
93	1	1	1	0	0	0	0	0	3	2	0	0	1	0	0	0	0	1	0	1
94	1	0	0	0	0	1	0	0	3	0	0	0	1	0	0	0	0	1	0	0
95	1	0	0	1	1	0	0	0	3	1	0	0	1	0	0	0	1	1	0	1
96	1	1	0	0	0	0	0	0	3	2	0	0	1	0	0	0	0	1	0	1
97	1	1	1	0	0	0	0	0	3	2	1	0	1	0	0	0	0	1	0	1
98	1	0	1	0	0	0	0	0	2	1	1	0	0	0	0	0	0	0	1	1
99	1	0	1	0	0	0	1	1	1	0	0	1	0	1	0	0	1	1	0	0
100	1	1	1	0	0	0	0	0	3	1	1	0	1	0	0	0	0	1	1	1
101	0	0	0	0	0	0	0	0	3	1	0	0	1	0	0	0	0	1	0	1
102	1	0	0	1	1	0	0	0	3	1	1	0	1	0	0	0	0	1	0	1
103	0	1	0	1	1	0	0	0	3	2	0	0	0	0	0	0	0	1	1	1
104	1	1	0	0	0	0	0	0	2	1	0	0	0	0	0	0	0	1	0	1
105	1	0	1	0	0	0	0	0	2	0	0	0	1	0	0	0	0	1	0	1
106	1	0	0	1	1	0	0	0	3	1	1	0	1	0	0	0	0	0	1	1
107	1	1	0	1	1	0	0	0	2	1	0	0	0	0	0	0	0	1	0	1
108	1	0	0	1	1	0	0	0	3	1	0	0	1	0	0	0	0	1	0	0
109	1	1	0	0	0	0	0	0	3	2	0	0	1	0	0	0	0	1	1	1
110	1	1	0	1	1	0	0	0	3	1	1	0	1	0	0	0	1	1	1	1
111	0	0	0	1	1	0	0	0	3	1	1	0	1	0	0	0	0	1	0	1
112	1	0	1	0	0	0	0	0	1	0	0	1	0	1	0	0	1	1	0	0
113	1	1	0	0	0	0	0	0	3	2	0	0	1	0	0	1	0	1	1	0
114	0	0	0	1	1	0	0	0	3	1	0	0	1	0	0	0	0	0	0	1
115	1	0	1	0	0	0	0	0	1	0	0	0	0	0	0	0	0	0	0	0
116	1	1	1	0	0	0	0	0	2	1	0	0	1	0	0	0	1	1	0	0
117	1	1	0	1	1	0	0	0	3	2	1	0	1	0	0	0	0	1	0	1
118	1	0	0	0	0	0	0	0	3	1	1	0	1	0	0	0	1	1	0	1
119	0	0	0	0	0	0	0	0	3	1	0	0	1	0	0	0	0	1	0	1
120	1	0	0	1	1	0	0	0	2	1	1	0	1	0	0	0	0	1	0	0
121	1	0	0	0	0	0	0	0	1	1	0	1	0	1	0	0	0	1	0	0
122	1	1	0	1	1	0	0	0	3	1	0	0	1	0	0	0	0	1	1	1
123	1	0	0	0	0	0	0	0	2	1	0	0	1	0	0	0	0	1	0	0
124	1	0	1	0	0	0	0	0	3	1	0	0	1	0	0	0	0	1	0	1
125	1	1	0	1	1	0	0	0	3	1	1	0	1	0	0	0	0	1	0	1
126	1	0	1	0	0	0	0	0	2	0	0	0	1	0	0	0	0	0	0	1
127	1	1	0	1	1	0	0	0	3	2	0	0	1	0	0	1	0	1	0	1
128	0	0	1	0	0	0	0	0	3	1	0	0	1	0	0	0	0	1	0	0
129	1	1	1	0	0	0	0	0	2	1	0	0	1	0	0	0	0	1	1	0
130	1	0	0	1	1	0	0	0	3	1	0	0	1	0	0	0	1	0	0	1
131	1	0	1	0	0	0	0	0	3	1	1	0	1	0	0	0	0	1	1	1
132	0	0	0	1	1	0	0	0	3	1	1	0	1	0	0	0	0	0	0	1
133	1	0	1	0	0	0	0	0	3	0	0	0	1	0	0	0	0	1	0	1
134	0	1	0	1	1	0	0	0	3	2	1	0	1	0	0	0	0	0	0	0
135	0	0	1	0	0	0	0	0	3	1	0	0	1	0	0	0	0	0	0	0
136	1	0	0	0	0	0	0	0	3	1	0	0	1	0	0	0	0	1	1	1
137	1	0	1	0	0	0	0	0	2	0	0	0	0	0	0	0	0	1	0	1
138	0	0	0	0	0	0	0	0	3	1	0	0	1	0	0	0	0	1	0	0
139	1	0	0	1	1	0	0	0	1	0	0	1	0	1	0	0	0	1	0	1
140	1	0	1	0	0	0	0	0	2	1	1	0	1	0	0	0	1	1	0	1
141	1	0	1	0	0	0	0	0	1	0	0	0	1	0	0	0	0	1	0	1
142	1	0	1	0	0	0	0	0	2	0	0	0	1	0	0	0	0	0	0	0
143	1	1	1	0	0	0	0	0	3	1	1	0	1	0	0	0	0	1	1	1
144	1	1	0	0	0	0	0	0	3	0	0	0	1	0	0	0	0	1	0	1
145	1	1	1	0	0	0	0	0	3	2	1	0	1	0	0	1	0	1	0	1
146	1	0	1	0	0	0	0	0	1	0	0	0	1	0	0	0	0	0	1	1
147	1	0	0	1	1	0	0	0	3	2	0	0	1	0	0	1	0	1	0	1
148	0	0	1	0	0	0	0	0	3	1	1	0	1	0	0	0	0	1	0	0
149	0	1	0	1	1	0	0	0	3	1	0	0	1	0	0	0	0	0	0	1
150	1	1	1	0	0	0	0	0	3	1	0	0	1	0	0	0	1	1	0	1
151	1	0	0	1	1	0	0	0	3	0	1	0	0	0	0	0	1	1	0	1
152	1	1	1	0	0	0	0	0	2	0	1	0	1	0	0	0	0	0	0	0
153	1	1	1	0	0	0	0	0	2	0	1	0	1	0	0	0	0	0	0	0
154	1	1	1	0	0	0	0	0	2	0	1	0	1	0	0	0	0	1	1	1
155	1	0	1	0	0	0	0	0	2	1	0	0	1	0	0	0	1	1	0	1
156	1	0	1	0	0	0	0	0	3	1	1	0	1	0	0	0	0	1	0	1
157	1	0	1	0	0	0	0	0	2	1	0	1	1	0	0	0	0	1	0	1
158	1	1	1	0	0	0	0	0	2	0	1	0	0	1	0	0	1	1	0	0
159	1	1	0	1	1	0	0	0	3	2	1	0	1	0	0	0	0	1	0	1
160	1	0	1	0	0	0	0	0	1	0	0	1	0	1	0	0	0	1	0	0
161	1	1	1	0	0	0	0	0	3	1	1	0	1	0	0	0	0	1	0	1
162	1	0	1	0	0	0	0	0	1	1	0	0	1	0	0	0	1	1	1	0
163	1	0	1	0	0	0	0	0	2	2	1	0	1	0	0	0	0	1	1	0
164	1	0	1	0	0	0	0	0	3	1	1	0	1	0	0	0	1	1	0	1
165	1	1	1	0	0	0	0	0	2	1	0	0	1	0	0	0	0	1	0	0
166	1	1	0	1	1	0	0	0	3	1	1	0	1	0	0	0	1	1	0	1
167	1	1	0	1	1	0	0	0	3	0	1	0	1	0	0	0	0	1	0	1
168	1	0	1	0	0	0	0	0	1	0	0	0	0	0	0	0	0	1	1	0
169	1	1	1	0	0	0	0	0	3	2	0	0	1	0	0	1	0	1	1	1
170	1	0	1	0	0	0	0	0	2	1	0	0	1	0	0	0	0	1	0	0
171	1	1	0	0	0	0	0	0	2	1	1	0	1	0	0	0	0	1	1	1
172	0	1	0	1	1	0	1	1	3	1	1	0	1	0	0	0	0	0	0	1
173	1	0	1	0	0	0	0	0	1	1	0	0	0	0	0	0	0	1	0	1
174	1	1	1	0	0	0	0	0	3	1	1	0	1	0	0	0	1	1	0	1
175	1	0	1	0	0	0	0	0	2	0	0	0	1	0	0	0	0	1	0	0
176	1	0	1	1	1	0	0	0	3	1	1	0	1	0	0	0	0	1	0	1
177	0	0	0	0	0	0	0	0	3	0	1	0	1	0	0	0	0	1	1	0
178	0	0	0	1	1	0	0	0	3	0	1	0	1	0	0	0	0	1	0	1
179	1	0	1	0	0	0	0	0	2	1	0	0	1	0	0	0	0	1	0	1
180	1	1	0	0	0	0	0	0	3	1	1	0	1	0	0	0	0	1	0	1
181	1	0	1	0	0	0	0	0	2	0	1	0	1	0	0	0	0	1	0	0
182	0	0	0	1	1	0	0	0	3	2	0	0	1	0	0	0	0	0	0	1
183	1	1	0	0	0	0	0	0	3	0	1	0	1	0	0	0	1	1	0	1
184	1	1	1	0	0	0	0	0	3	1	0	0	1	0	0	0	1	1	0	1
185	1	0	1	0	0	0	0	0	3	1	0	0	1	0	0	0	0	1	1	1
186	1	1	1	0	0	0	0	0	2	1	1	0	1	0	0	0	0	0	0	1
187	1	0	0	0	0	0	0	0	2	1	0	0	1	0	0	0	0	0	0	0
188	1	0	0	0	0	0	0	0	1	1	0	0	0	0	0	0	0	1	1	0
189	1	1	1	0	0	0	0	0	3	1	0	0	1	0	0	0	0	1	0	1
190	0	0	0	0	0	0	0	0	3	1	1	0	1	0	0	0	0	0	0	1
191	1	1	0	1	1	0	0	0	3	1	1	0	1	0	0	0	0	1	1	0
192	1	0	1	0	0	0	0	0	3	2	1	0	1	0	0	0	0	1	0	1
193	1	0	1	0	0	0	0	0	2	1	0	0	1	0	0	0	0	1	0	1
194	0	1	0	1	1	0	0	0	3	1	0	0	1	0	0	0	0	1	0	1
195	0	0	1	0	0	0	0	0	3	2	0	0	1	0	0	1	0	0	0	0
196	1	0	1	0	0	0	0	0	2	0	0	0	1	0	0	0	0	1	1	0
197	1	0	0	1	1	0	0	0	3	1	1	0	1	0	0	0	0	1	0	1
198	1	0	0	1	1	0	0	0	1	1	0	0	1	0	0	0	0	1	1	0
199	1	1	0	1	1	0	0	0	3	2	1	0	1	0	0	1	0	1	0	1
200	0	0	0	1	1	0	1	0	2	1	0	0	0	0	0	0	0	1	0	0
201	1	0	1	0	0	0	0	0	1	1	0	0	1	0	0	0	1	1	1	0
202	1	1	0	0	0	0	0	0	2	2	1	0	1	0	0	0	0	0	1	1
203	0	0	1	0	0	0	0	0	3	1	0	0	1	0	0	0	0	0	1	1
204	1	1	0	0	0	0	0	0	3	1	1	0	1	0	0	0	0	1	1	1
205	1	1	1	0	0	0	0	0	3	1	0	0	1	0	0	0	0	1	0	1
206	1	1	0	1	1	0	0	0	3	0	1	0	1	0	0	0	0	1	1	1
207	0	0	1	0	0	0	0	0	3	1	1	0	1	0	0	0	0	0	0	0
208	1	0	1	0	0	0	0	0	2	1	0	0	1	0	0	0	0	1	0	1
209	1	1	1	0	0	0	0	0	2	1	0	0	1	0	0	0	0	1	0	1
210	1	1	1	0	0	0	0	0	2	0	0	0	1	0	0	0	1	1	0	1
211	1	0	1	0	0	0	0	0	2	1	0	0	1	0	0	1	0	1	0	0
212	1	0	1	0	0	0	0	0	3	1	1	0	1	0	0	0	0	1	0	1
213	0	0	0	0	0	0	0	0	3	0	0	0	1	0	0	0	0	1	0	1
214	1	0	0	0	0	0	0	0	1	2	0	0	1	0	0	1	0	1	0	1
215	1	1	0	0	0	0	0	0	2	1	1	0	1	0	0	0	0	1	0	1
216	1	1	0	0	0	0	0	0	2	2	0	0	1	0	0	0	0	0	0	1
217	1	0	1	0	0	0	0	0	2	1	0	0	0	0	0	0	0	1	0	0
218	1	0	1	0	0	0	0	0	3	0	0	0	1	0	0	0	0	1	1	1
219	0	0	1	0	0	0	0	0	3	0	0	0	1	0	0	0	0	0	1	0
220	1	0	1	0	0	0	0	0	2	1	0	0	1	0	0	0	0	1	0	0
221	1	1	1	0	0	0	0	0	2	2	0	0	0	0	0	0	0	1	1	1
222	1	1	0	0	0	0	0	0	2	2	0	0	0	0	0	0	0	1	1	1
223	1	0	0	1	1	0	0	0	3	0	1	0	1	0	0	0	0	1	1	0
224	1	1	1	0	0	0	0	0	2	1	0	0	1	0	0	0	0	1	0	0
225	1	0	1	0	0	0	0	0	3	1	0	0	1	0	0	0	0	1	1	1
226	1	1	1	0	0	0	0	0	2	2	0	0	1	0	0	0	0	0	1	1
227	1	1	0	1	1	0	0	0	3	1	0	0	1	0	0	0	0	1	1	1
228	0	0	0	1	1	0	0	0	3	1	0	1	0	0	0	0	0	0	0	0
229	1	0	1	0	0	0	0	0	1	0	0	1	1	0	0	0	0	1	0	0
230	1	0	1	0	0	0	0	0	1	1	0	0	1	0	0	0	1	1	0	0
231	0	0	0	1	1	0	0	0	3	1	0	1	1	0	0	0	0	1	0	0
232	0	0	1	0	0	0	0	0	3	0	1	0	1	0	0	0	0	1	0	0
233	1	0	0	0	0	0	0	0	1	1	0	0	0	0	0	0	0	1	1	1
234	1	1	1	0	0	0	0	0	3	1	1	0	1	0	0	0	0	1	1	0
235	1	1	1	1	0	0	0	0	2	2	1	0	1	0	0	0	0	1	1	1
236	1	1	0	1	1	0	0	0	3	2	0	0	1	0	0	0	1	0	0	1
237	1	1	1	0	0	0	0	0	3	0	0	0	1	0	0	0	0	1	1	1
238	1	0	0	1	1	0	0	0	3	1	1	0	1	0	0	0	0	1	1	1
239	1	1	1	0	0	0	0	0	1	1	0	1	0	0	0	0	1	1	0	1
240	1	0	0	1	1	0	0	0	3	0	0	0	1	0	0	0	0	1	0	1
241	1	0	1	0	0	0	0	0	1	0	0	0	0	0	0	0	0	1	1	0
242	1	0	0	1	1	0	0	0	2	1	0	0	1	0	0	0	0	1	0	0
243	1	0	0	0	0	0	0	0	3	1	0	0	1	0	0	0	0	1	1	1
244	0	0	0	1	1	0	0	0	3	1	0	1	1	0	0	0	0	1	0	0
245	1	1	1	0	0	0	0	0	3	1	0	0	1	0	0	0	0	1	1	0
246	1	1	1	0	0	0	0	0	3	1	1	0	1	0	0	0	0	1	1	1
247	1	0	0	0	0	0	0	0	2	1	0	0	1	0	0	0	0	1	0	0
248	1	1	1	0	0	0	0	0	3	1	0	0	1	0	0	0	0	1	0	1
249	1	1	0	1	1	0	0	0	3	1	1	0	1	0	0	0	0	1	1	1
250	1	0	1	0	0	0	0	0	1	1	0	0	0	0	0	0	1	1	0	0
251	1	1	0	1	1	0	0	0	3	2	1	0	1	0	0	0	0	0	1	1
252	1	0	1	0	0	0	0	0	2	1	0	0	1	0	0	0	0	1	0	0
253	0	0	0	1	1	0	0	0	2	1	1	0	1	0	0	0	1	1	0	1
254	1	1	0	0	0	0	0	0	1	1	0	0	1	0	0	0	0	0	1	1
255	1	0	1	0	0	0	0	0	1	1	1	0	1	0	0	0	0	1	0	0
256	0	1	1	0	0	0	0	0	2	0	1	0	1	0	0	0	0	1	0	1
257	1	0	1	0	0	0	0	0	1	1	0	0	1	0	0	0	1	1	0	0
258	1	1	0	1	1	0	0	0	3	2	1	0	1	0	0	0	0	1	0	1
259	1	1	1	0	0	0	0	0	3	2	1	0	1	0	0	0	0	1	1	1
260	1	0	0	0	0	0	0	0	1	0	0	0	1	0	0	0	0	1	0	0
261	0	1	1	0	0	0	0	0	3	1	1	0	1	0	0	0	0	1	0	1
262	1	1	1	0	0	0	0	0	3	2	1	0	1	0	0	0	1	1	0	1
263	1	0	0	0	0	0	0	0	3	1	1	0	1	0	0	0	0	0	1	1
264	1	0	1	0	0	0	0	0	2	0	0	1	0	0	0	0	0	1	0	0
265	1	1	0	0	0	0	0	0	2	1	0	0	1	0	0	0	0	1	0	1
266	1	1	1	0	0	0	0	0	2	2	1	0	1	0	0	0	0	1	0	1
267	1	0	1	0	0	0	0	0	1	0	0	1	0	0	0	0	0	1	0	0
268	1	1	1	0	0	0	0	0	3	1	0	0	1	0	0	0	0	1	0	1
269	1	1	1	0	0	0	0	0	3	1	1	0	1	0	0	0	1	1	0	1
270	0	0	1	0	0	0	0	0	3	1	0	0	1	0	0	0	0	1	0	1
271	0	0	1	0	0	0	0	0	3	1	0	0	1	0	0	0	0	0	0	1
272	1	0	1	0	0	0	0	0	2	0	1	0	1	0	0	0	0	1	0	0
273	1	0	0	0	0	0	0	0	2	1	0	1	1	0	0	0	0	0	0	0
274	1	1	0	1	1	0	0	0	3	1	0	0	1	0	0	0	1	1	0	0
275	1	1	1	0	0	0	0	0	2	1	0	0	1	0	0	0	0	0	0	0
276	1	1	1	0	0	0	0	0	2	1	0	0	1	0	0	0	0	0	0	1
277	0	0	1	0	0	0	0	0	3	1	0	0	1	0	0	0	0	0	0	0
278	0	1	1	0	0	0	0	0	3	0	0	1	0	0	0	0	0	0	0	0
279	0	0	1	0	0	0	0	0	3	0	0	0	1	0	0	0	0	0	0	0
280	0	1	0	1	1	0	0	0	3	2	0	0	1	0	0	0	0	1	0	1
281	0	0	1	0	0	0	0	0	3	1	0	0	1	0	0	0	0	0	0	1
282	1	1	0	0	0	0	0	0	3	2	1	0	1	1	0	0	0	1	1	1
283	1	0	0	0	0	0	0	0	2	1	1	0	1	0	0	0	1	1	0	1
284	0	0	0	0	0	0	0	0	3	0	0	0	1	0	0	0	0	0	0	1
285	1	0	1	0	0	0	0	0	3	1	1	0	1	0	0	0	0	1	1	1
286	1	0	1	0	0	0	0	0	1	1	0	0	1	0	0	0	0	1	0	1
287	1	0	0	1	1	0	0	0	2	1	0	0	1	0	0	0	1	0	0	0
288	0	0	1	0	0	0	0	0	3	0	0	0	1	0	0	0	0	1	0	1
289	0	0	0	1	1	0	0	0	3	1	0	0	1	0	0	0	0	1	0	1
290	1	1	1	0	0	0	0	0	2	1	0	0	1	0	0	0	0	1	1	1
291	1	1	0	0	0	0	0	0	3	1	1	0	1	0	0	0	0	1	0	1
292	0	0	1	0	0	0	0	0	3	1	0	1	1	0	0	0	0	1	0	1
293	1	1	1	0	0	0	0	0	3	1	0	0	1	0	0	0	0	1	0	1
294	1	0	1	0	0	0	0	0	2	2	0	0	1	0	0	0	0	1	1	1
295	0	1	0	0	0	0	1	0	3	2	0	0	1	0	0	1	0	1	0	1
296	1	1	1	0	0	0	0	0	3	0	0	0	1	0	0	0	0	1	0	1
297	0	0	1	0	0	0	0	0	1	1	0	1	1	0	0	0	0	0	0	0
298	0	1	0	0	0	0	1	0	1	0	0	0	1	0	0	0	0	1	0	0
299	1	1	0	1	1	0	0	0	2	1	0	0	1	0	0	0	0	1	0	0
300	0	1	1	0	0	0	0	0	3	0	0	0	0	0	0	0	0	1	0	0
301	1	1	1	0	0	0	0	0	3	1	1	0	1	0	0	0	0	1	0	1
302	1	1	1	0	0	0	0	0	2	2	1	0	1	0	0	0	0	1	1	1
303	0	0	0	1	1	0	0	0	1	2	0	0	1	0	0	0	1	0	1	1
304	0	1	1	0	0	0	0	0	1	1	0	0	1	0	0	0	0	1	0	1
305	0	0	0	1	1	0	0	0	3	1	0	0	1	0	0	0	0	0	0	1
306	1	1	0	0	0	0	0	0	3	1	0	0	1	0	0	0	0	1	1	0
307	1	0	0	1	1	0	0	0	3	2	1	0	1	0	0	0	0	1	0	1
308	1	0	1	0	0	0	0	0	2	1	0	0	1	0	0	0	0	1	1	1
309	1	0	1	0	0	0	0	0	3	1	0	1	0	0	0	0	0	1	0	0
310	1	0	0	1	1	0	0	0	3	0	0	0	1	0	0	0	0	1	0	0
311	1	0	1	0	0	0	0	0	3	1	0	0	1	0	0	0	0	1	1	0
312	1	1	1	0	0	0	0	0	3	1	0	1	1	0	0	0	0	1	1	0
313	1	0	1	0	0	0	0	0	3	2	1	0	1	0	0	0	0	1	1	1
314	1	1	1	0	0	0	0	0	3	2	0	0	1	0	0	0	0	1	0	1
315	1	1	0	0	0	0	0	0	3	2	0	0	0	0	0	0	0	0	1	1
316	1	1	1	0	0	0	0	0	3	1	0	0	1	0	0	0	0	1	0	1
317	1	0	1	0	0	0	0	0	3	1	0	0	1	0	0	0	0	1	1	0
318	1	0	1	0	0	0	0	0	3	1	0	0	1	0	0	1	0	1	0	0
319	0	0	1	0	0	0	0	0	3	1	0	1	0	1	0	0	0	0	0	0
320	1	1	1	0	0	0	0	0	3	1	0	0	1	0	0	0	0	1	1	0
321	1	1	1	0	0	0	0	0	3	1	0	0	1	0	0	0	0	1	1	1
322	0	0	1	0	0	0	0	0	2	1	0	0	1	0	1	0	0	1	0	1
323	1	1	0	1	1	0	0	0	2	2	1	0	1	0	0	0	0	1	1	1
324	0	1	1	0	0	0	0	0	3	1	0	1	0	1	0	0	0	1	1	0
325	1	0	0	1	1	0	0	0	3	2	0	0	1	0	0	1	0	1	0	0
326	0	1	1	0	0	0	0	0	3	0	0	0	0	0	0	0	0	1	0	1
327	1	0	1	0	0	0	0	0	3	2	0	0	1	0	0	0	0	1	0	1
328	1	0	1	0	0	0	0	0	3	1	0	0	1	0	0	0	0	1	1	0
329	0	0	0	1	1	1	0	0	3	2	1	0	1	0	0	0	0	1	0	1
330	1	1	1	0	0	1	0	0	3	1	0	0	1	0	0	0	0	1	1	0
331	1	0	0	0	0	0	1	0	3	0	0	1	0	0	0	0	0	1	0	0
332	1	1	1	0	0	0	0	0	3	1	0	0	1	0	0	1	0	1	0	0
333	0	1	0	0	0	0	0	0	3	0	0	0	1	0	0	0	0	0	0	0
334	0	1	1	0	0	0	1	0	1	1	0	1	1	0	0	0	0	1	0	0
335	0	0	0	0	0	0	0	0	3	1	1	0	1	0	0	0	0	0	0	1
336	1	0	1	0	0	0	0	0	3	1	0	0	1	0	0	0	0	1	0	1
337	1	0	1	0	0	0	0	0	2	0	0	0	1	0	0	0	0	1	1	0
338	0	0	1	0	0	0	0	0	2	0	0	0	0	0	0	0	0	0	1	0
339	1	1	0	0	0	0	0	0	3	1	0	0	1	0	0	0	0	0	1	1
340	0	0	1	0	0	0	0	0	2	1	0	1	1	0	0	0	0	1	0	1
341	1	1	1	0	0	0	0	0	3	1	0	0	1	0	0	0	0	1	1	1
342	0	0	1	0	0	0	0	0	2	0	0	1	1	0	0	0	0	0	0	1
343	1	1	1	0	0	0	0	0	3	0	0	0	1	0	0	0	0	1	0	1
344	1	0	1	0	0	0	0	0	3	1	0	0	1	0	0	0	0	1	1	0
345	0	0	1	0	0	0	0	0	1	2	0	0	0	0	0	0	0	0	0	1
346	1	1	1	0	0	0	0	0	3	1	1	0	1	0	0	0	0	0	0	1
347	1	0	0	0	0	0	1	0	3	0	0	1	1	0	0	0	0	1	1	1
348	1	1	0	1	0	0	0	0	2	1	1	0	1	0	0	0	0	0	0	1
349	1	0	0	0	0	0	0	0	1	1	0	0	1	0	0	0	0	1	1	1
350	1	1	1	0	0	0	0	0	2	2	1	0	1	0	0	1	0	1	1	1
351	1	0	0	0	0	0	0	0	3	2	0	0	1	0	0	0	0	1	0	1
352	1	0	1	0	0	0	0	0	3	2	0	1	1	0	0	0	0	1	0	1
353	1	1	1	0	0	0	0	0	3	2	0	0	1	0	0	0	0	0	0	1
354	1	1	0	1	0	0	0	0	2	1	1	0	1	0	0	0	0	1	1	1
355	1	1	0	1	1	0	0	0	3	1	1	0	1	1	0	0	0	1	0	1
356	1	1	0	0	0	0	0	0	3	1	1	0	1	0	0	0	1	1	0	1
357	0	0	0	1	1	0	0	0	3	1	0	0	1	0	0	0	0	1	0	0
358	1	0	1	0	0	0	0	0	2	1	1	0	1	0	0	0	0	1	1	1
359	1	1	0	0	0	0	0	0	1	2	1	0	1	0	0	0	0	1	0	1
360	1	0	0	1	1	0	1	1	3	0	0	0	0	1	0	0	1	1	0	0
361	0	0	0	1	1	0	0	0	1	2	0	0	1	0	0	0	0	1	1	0
362	1	0	1	0	0	0	1	0	3	1	0	0	1	0	0	0	0	1	1	0
363	1	1	0	0	0	0	0	0	3	1	0	0	1	0	0	0	0	0	1	1
364	1	0	0	0	0	0	0	0	3	1	1	0	1	0	0	0	0	1	0	1
365	0	0	0	1	1	0	0	0	3	1	0	1	1	0	0	0	0	1	0	0
366	1	1	0	0	0	0	0	0	3	2	0	0	1	0	0	0	0	1	1	1
367	1	0	0	0	0	0	0	0	2	0	0	1	0	1	0	0	0	1	1	0
368	1	1	1	0	0	0	0	0	2	0	0	0	0	0	0	0	0	1	1	0
369	1	1	1	0	0	0	1	1	1	1	1	0	1	0	0	0	0	1	1	1
370	1	1	0	1	1	0	0	0	1	2	1	0	1	0	0	0	0	1	1	1
371	1	0	1	0	0	0	0	0	2	2	0	0	1	0	0	0	0	1	1	1
372	0	0	1	0	0	0	0	0	3	1	0	0	1	0	0	1	0	1	0	0
373	0	1	0	0	0	0	0	0	2	0	0	0	1	0	0	0	0	0	0	1
374	1	0	1	0	0	0	1	1	3	1	1	0	1	0	0	0	0	1	1	1
375	0	1	0	0	0	0	0	0	2	1	1	0	1	0	0	0	0	1	0	0
376	1	1	1	0	0	0	0	0	3	1	0	0	1	0	0	0	0	1	0	1
377	1	1	0	0	0	0	1	1	2	1	0	1	1	0	0	0	0	1	1	1
378	0	0	1	0	0	0	0	0	2	1	0	1	0	0	0	0	0	1	0	0
379	1	0	0	0	0	0	0	0	3	1	0	0	1	0	0	0	0	1	0	1
380	1	0	0	0	0	1	0	0	2	2	0	1	1	0	0	0	0	1	1	1
381	1	0	1	0	0	0	0	0	3	0	0	0	1	0	0	0	1	0	0	0
382	1	0	1	0	0	0	0	0	2	1	0	1	0	1	0	0	0	1	0	1
383	1	0	1	0	0	0	0	0	3	1	0	1	0	1	0	0	0	1	0	0
384	1	1	1	0	0	0	0	0	1	1	1	0	1	0	0	0	0	0	1	1
385	1	1	0	1	1	0	0	0	3	1	0	0	1	0	0	0	0	1	0	1
386	1	1	0	1	1	0	0	0	3	1	1	0	1	0	0	0	0	1	1	0
387	1	1	1	0	0	0	0	0	2	1	0	0	1	0	0	0	0	1	1	1
